# Supplementary material
Source: Atypon-hosted journal article supplement (doi:10.1287/msom.2024.1351)
Supplement: msom.2024.1351.sm1.pdf [file msom.2024.1351.sm1.pdf]

# Helping Vulnerable Hospitals: Evidence from a Medical Poverty Alleviation Program

Qiang Li

Lazaridis School of Business and Economics, Wilfrid Laurier University, Waterloo, qli@wlu.ca

Meng Li

C.T. Bauer College of Business, University of Houston, Houston, mli@bauer.uh.edu

Wei Gu\*

School of Economics and Management, University of Science and Technology Beijing, Beijing,  
guwei@ustb.edu.cn

Zhi Cao

Business School, Sichuan University, Chengdu, zcao@scu.edu.cn

## Appendix: Supplementary Figures and Tables

**Figure A.1 Typical Process of Patients Accessing Medical Services**

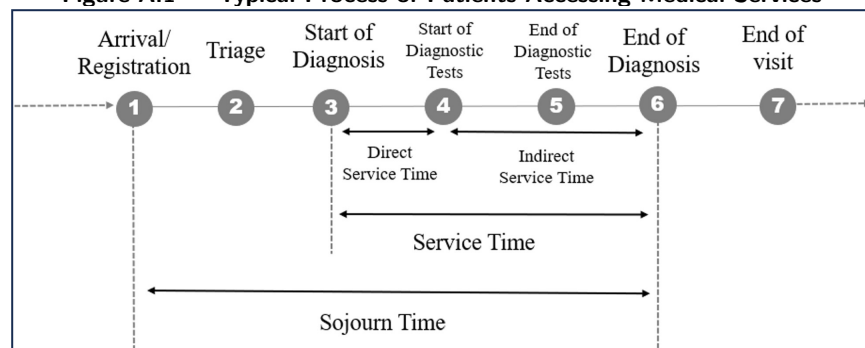

**Figure A.2 Monthly Trends in External Expert Visits to the Local Hospital**

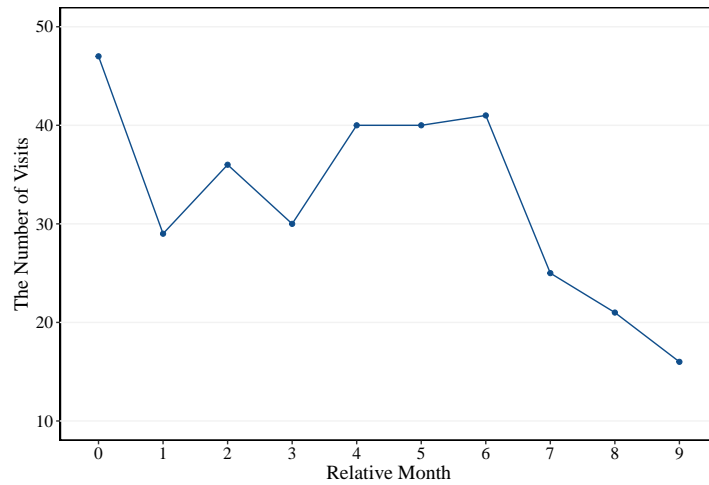

Note: The values on the *x*-axis represent months relative to the first month of treatment, with zero indicating the month in which the department received the intervention.

**Table A.1 Survey: Effects of MPAP on Service Efficiency and Quality**

|                                                                                                | Sample Size | Mean | S.D. | Median | Difference from Neutral Point ( <i>p</i> value) |
|------------------------------------------------------------------------------------------------|-------------|------|------|--------|-------------------------------------------------|
| Panel A: Survey Results from the Local Hospital                                                |             |      |      |        |                                                 |
| Q1. Do you think the MPAP improves the service efficiency of your/your institution's services? | 98          | 6.50 | 0.94 | 7      | 0.000                                           |
| Q2. Do you think the MPAP improves the service quality of your/your institution's services?    | 98          | 6.51 | 0.95 | 7      | 0.000                                           |
| Panel B: Survey Results from Four Other Hospitals                                              |             |      |      |        |                                                 |
| Q1. Do you think the MPAP improves the service efficiency of your/your institution's services? | 146         | 6.53 | 1.00 | 7      | 0.000                                           |
| Q2. Do you think the MPAP improves the service quality of your/your institution's services?    | 146         | 6.55 | 0.95 | 7      | 0.000                                           |

Notes: This table reports the summary statistics of two surveys: (i) we survey 98 physicians in the local hospital of our studied to understand how the MPAP affects their service efficiency and quality, and (ii) we survey 146 physicians from another four hospitals located in under-resourced regions to understand how the MPAP affects their service efficiency and quality. We conduct the *t*-test to test the difference between the level of agreement and neutral point 4.

**Table A.2 Balance Test for MPAP Introduction across Departments**

|                      | Introduction Randomness |
|----------------------|-------------------------|
| Service time         | 0.016<br>(0.011)        |
| 7-day revisit        | 0.407<br>(2.076)        |
| Total visits         | 0.00004<br>(0.0002)     |
| Follow-up visit      | 0.0003<br>(0.0007)      |
| Acuteness of Illness | -5.467<br>(3.454)       |
| Number of physicians | -0.028<br>(0.044)       |
| Observations         | 33                      |

Notes: This table reports the estimated coefficients and standard errors (in parentheses).

**Table A.3 Data Selection and Process**

| Data Sample                                                                          | Observations | % Prior | % Initial |
|--------------------------------------------------------------------------------------|--------------|---------|-----------|
| All outpatient visits between Apr 1, 2017 and March 31, 2018                         | 388,823      | NA      | 100%      |
| Excluding records without necessary information (e.g., time stamps, age, and gender) | 332,631      | 85.55%  | 85.55%    |
| Excluding service time outliers                                                      | 317,984      | 95.60%  | 81.78%    |
| Exclude all normal follow-up visits                                                  | 287,715      | 90.48%  | 74.00%    |
| Exclude visits treated directly by physicians from the top-tier hospital             | 283,943      | 98.69%  | 73.03%    |

Note: % prior represents the percentage compared with the prior sample; % initial represents the percentage compared with the initial sample.

**Table A.4 Correlation Table of Key Variables in Matched Sample**

|                                 | 1     | 2     | 3     | 4     | 5     | 6     | 7     | 8     | 9     | 10    | 11    | 12    | 13   | 14   |
|---------------------------------|-------|-------|-------|-------|-------|-------|-------|-------|-------|-------|-------|-------|------|------|
| 1. Service time                 | 1.00  |       |       |       |       |       |       |       |       |       |       |       |      |      |
| 2. Direct service time          | 0.21  | 1.00  |       |       |       |       |       |       |       |       |       |       |      |      |
| 3. Indirect service time        | 0.96  | -0.08 | 1.00  |       |       |       |       |       |       |       |       |       |      |      |
| 4. 7-day revisit                | 0.03  | -0.01 | 0.03  | 1.00  |       |       |       |       |       |       |       |       |      |      |
| 5. No. of diagnostic tests      | 0.55  | 0.11  | 0.53  | -0.04 | 1.00  |       |       |       |       |       |       |       |      |      |
| 6. Age                          | 0.02  | 0.00  | 0.02  | -0.07 | 0.04  | 1.00  |       |       |       |       |       |       |      |      |
| 7. Gender                       | -0.01 | -0.01 | -0.01 | -0.00 | -0.01 | 0.00  | 1.00  |       |       |       |       |       |      |      |
| 8. No. of patients              | 0.01  | -0.07 | 0.04  | 0.08  | -0.06 | -0.01 | 0.00  | 1.00  |       |       |       |       |      |      |
| 9. No of patients on duty       | -0.08 | 0.02  | -0.08 | -0.01 | -0.15 | 0.07  | 0.01  | 0.53  | 1.00  |       |       |       |      |      |
| 10. Urgency of the disease      | 0.07  | 0.02  | 0.07  | 0.08  | 0.08  | -0.11 | -0.00 | 0.07  | -0.07 | 1.00  |       |       |      |      |
| 11. Time period of registration | -0.17 | 0.03  | -0.18 | -0.03 | -0.12 | -0.04 | -0.01 | 0.05  | 0.06  | 0.02  | 1.00  |       |      |      |
| 12. Physician experience        | 0.07  | -0.03 | 0.08  | 0.03  | 0.11  | -0.05 | 0.01  | 0.11  | -0.15 | 0.07  | -0.12 | 1.00  |      |      |
| 13. Assistant experience        | -0.04 | 0.01  | -0.05 | -0.05 | -0.03 | 0.08  | -0.01 | -0.12 | 0.09  | -0.09 | 0.01  | -0.19 | 1.00 |      |
| 14. Tenure difference           | -0.05 | 0.01  | -0.06 | -0.04 | -0.07 | 0.08  | -0.01 | -0.04 | 0.17  | -0.09 | 0.04  | -0.23 | 0.85 | 1.00 |
| Mean                            | 49.13 | 7.54  | 41.59 | 0.17  | 0.95  | 4.00  | 0.58  | 76.77 | 3.25  | 0.14  | 10.21 | 20.17 | 0.13 | 1.24 |
| S.D.                            | 68.51 | 19.22 | 67.26 | 0.38  | 1.28  | 2.96  | 0.49  | 39.91 | 2.52  | 0.35  | 2.53  | 13.69 | 0.34 | 3.79 |

Notes: This correlation relationship table is estimated based on the matched sample with 215,196 observations.

**Table A.5 Summary Statistics Before and After Matching: A Comparison**

|                  | Before Matching |           |                 | After Matching |           |                 |
|------------------|-----------------|-----------|-----------------|----------------|-----------|-----------------|
|                  | Control         | Treatment | <i>p</i> -value | Control        | Treatment | <i>p</i> -value |
| Service time     | 54.809          | 45.077    | 0.21            | 54.087         | 45.827    | 0.35            |
|                  | [56.847]        | [54.228]  | [0.29]          | [56.847]       | [54.228]  | [0.46]          |
| 7-day revisit    | 0.176           | 0.093     | 0.09            | 0.149          | 0.130     | 0.61            |
|                  | [0.159]         | [0.099]   | [0.06]          | [0.159]        | [0.121]   | [0.54]          |
| Gender           | 0.574           | 0.604     | 0.36            | 0.571          | 0.609     | 0.15            |
|                  | [0.576]         | [0.616]   | [0.10]          | [0.576]        | [0.616]   | [0.09]          |
| Age              | 3.678           | 4.592     | <b>0.03</b>     | 3.867          | 4.400     | 0.16            |
|                  | [3.635]         | [4.340]   | [0.05]          | [3.661]        | [4.162]   | [0.12]          |
| Number of visits | 51.645          | 30.348    | 0.24            | 62.683         | 44.089    | 0.39            |
|                  | [32.046]        | [20.054]  | [0.33]          | [51.228]       | [48.548]  | [0.61]          |
| Urgency          | 0.201           | 0.043     | <b>0.01</b>     | 0.208          | 0.080     | 0.10            |
|                  | [0.239]         | [0.013]   | [0.02]          | [0.239]        | [0.057]   | [0.28]          |

Notes: The first row for each variable presents the mean values for the control and treatment departments, with the corresponding *p*-value obtained from a t-test. The values in square brackets indicate the median of each variable, with the associated *p*-value derived from the Wilcoxon signed-rank test. Bold figures represent the significant difference between two groups ( $p < 0.05$ ).

**Table A.6 Effects of MPAP on Direct and Indirect Time**

|                | Direct Service Time<br>(1) | Indirect Service Time<br>(2) |
|----------------|----------------------------|------------------------------|
| MPAP           | 0.195***<br>(0.049)        | -0.330***<br>(0.091)         |
| Controls       | Y                          | Y                            |
| Fixed Effects  | Y                          | Y                            |
| Observations   | 215,196                    | 215,196                      |
| Adjusted $R^2$ | 0.310                      | 0.404                        |

Notes: All the models include both department and time fixed effects. The dependent variable is log-transformed. Standard errors clustered at the physician level are reported in parentheses. \*\*\*  $p < 0.01$ .

**Table A.7 Impact on The Number of Examination Types**

|                   | No. of Examination Types<br>(1) |
|-------------------|---------------------------------|
| MPAP              | -0.062*<br>(0.035)              |
| Control Variables | Y                               |
| Fixed Effects     | Y                               |
| Observations      | 215,196                         |
| Adjusted $R^2$    | 0.731                           |

Notes: All the models include both department and time fixed effects. The dependent variable is log-transformed. Standard errors clustered at the physician level are reported in parentheses. Significance at \*  $p < 0.1$ , \*\*  $p < 0.05$ , and \*\*\*  $p < 0.01$ .

**Table A.8 Effects of MPAP on Full Sample**

|                | Service Time<br>(1) | 7-day Revisit<br>(2) |
|----------------|---------------------|----------------------|
| MPAP           | -0.076**<br>(0.032) | -0.100**<br>(0.039)  |
| Controls       | Y                   | Y                    |
| Fixed Effects  | Y                   | Y                    |
| Observations   | 283,943             | 283,943              |
| Adjusted $R^2$ | 0.326               | -                    |

Notes: All the models include both department and time fixed effects. The dependent variable of service time in Columns (1) is log-transformed. Standard errors clustered at the physician level are reported in parentheses. Significance at \*  $p < 0.1$ , \*\*  $p < 0.05$ , and \*\*\*  $p < 0.01$ .

**Table A.9 Effects of MPAP: Whether Having Assistant Experience**

|                | Physicians with Assistant Experience<br>in the Treatment |                      | Physicians without Assistant Experience<br>in the Treatment |                      |
|----------------|----------------------------------------------------------|----------------------|-------------------------------------------------------------|----------------------|
|                | Service Time<br>(1)                                      | 7-day Revisit<br>(2) | Service Time<br>(3)                                         | 7-day Revisit<br>(4) |
| MPAP           | -0.117**<br>(0.048)                                      | -0.233***<br>(0.058) | -0.064<br>(0.042)                                           | -0.130***<br>(0.050) |
| Controls       | Y                                                        | Y                    | Y                                                           | Y                    |
| Fixed Effects  | Y                                                        | Y                    | Y                                                           | Y                    |
| Observations   | 142,807                                                  | 142,807              | 187,360                                                     | 187,360              |
| Adjusted $R^2$ | 0.379                                                    | -                    | 0.388                                                       | -                    |

Notes: All the models include both department and time fixed effects. The dependent variable of service time in Columns (1) and (3) is log-transformed. Standard errors clustered at the physician level are reported in parentheses. Significance at \*  $p < 0.1$ , \*\*  $p < 0.05$ , and \*\*\*  $p < 0.01$ .

**Table A.10 Dynamic Effects of MPAP on Service Efficiency and Quality**

|                            | Service Time<br>(1)  | 7-Day Revisit<br>(2) |
|----------------------------|----------------------|----------------------|
| MPAP <sup>After 0-1m</sup> | -0.082***<br>(0.029) | -0.124**<br>(0.048)  |
| MPAP <sup>After 2-3m</sup> | -0.114***<br>(0.043) | -0.158**<br>(0.065)  |
| MPAP <sup>After 4-5m</sup> | -0.058<br>(0.050)    | -0.158**<br>(0.065)  |
| MPAP <sup>After 6+m</sup>  | -0.070<br>(0.057)    | -0.162***<br>(0.059) |
| Control Variables          | Y                    | Y                    |
| Fixed Effects              | Y                    | Y                    |
| Observations               | 215,196              | 215,196              |
| Adjusted $R^2$             | 0.379                | -                    |

Notes: All the models include both department and time fixed effects. The dependent variable of service time in Columns (1) is log-transformed. Standard errors clustered at the physician level are reported in parentheses. Significance at \*  $p < 0.1$ , \*\*  $p < 0.05$ , and \*\*\*  $p < 0.01$ .

**Table A.11 Moderating Effect of Visiting Intensity**

|                                      | No Lag              |                      | Lag 1 Month         |                      | Lag 2 Months        |                      |
|--------------------------------------|---------------------|----------------------|---------------------|----------------------|---------------------|----------------------|
|                                      | Service Time<br>(1) | 7-Day Revisit<br>(2) | Service Time<br>(3) | 7-Day Revisit<br>(4) | Service Time<br>(5) | 7-Day Revisit<br>(6) |
| MPAP                                 | -0.081*<br>(0.045)  | -0.147***<br>(0.056) | -0.074**<br>(0.036) | -0.158***<br>(0.047) | -0.074**<br>(0.036) | -0.158***<br>(0.047) |
| MPAP ×<br>Visiting Intensity         | 0.004<br>(0.011)    | -0.008<br>(0.014)    |                     |                      |                     |                      |
| MPAP ×<br>Visiting Intensity (lag 1) |                     |                      | -0.005<br>(0.009)   | -0.021<br>(0.014)    |                     |                      |
| MPAP ×<br>Visiting Intensity (lag 2) |                     |                      |                     |                      | -0.013<br>(0.008)   | -0.024*<br>(0.014)   |
| Control Variables                    | Y                   | Y                    | Y                   | Y                    | Y                   | Y                    |
| Fixed Effects                        | Y                   | Y                    | Y                   | Y                    | Y                   | Y                    |
| Observations                         | 215,196             | 215,196              | 215,196             | 215,196              | 215,196             | 215,196              |
| Adjusted $R^2$                       | 0.379               | -                    | 0.379               | -                    | 0.379               | -                    |

Notes: All the models include both department and time fixed effects. The dependent variable of service time in Columns (1), (3) and (5) is log-transformed. Standard errors clustered at the physician level are reported in parentheses. Significance at \*  $p < 0.1$ , \*\*  $p < 0.05$ , and \*\*\*  $p < 0.01$ .

**Table A.12 Effects of MPAP with Second Stage Matching at the Patient Level**

|                   | Service Time<br>(1) | 7-Day Revisit<br>(2) |
|-------------------|---------------------|----------------------|
| MPAP              | -0.083**<br>(0.038) | -0.163***<br>(0.050) |
| Control Variables | Y                   | Y                    |
| Fixed Effects     | Y                   | Y                    |
| Observations      | 193,299             | 193,299              |
| Adjusted $R^2$    | 0.385               | -                    |

Notes: All the models include both department and time fixed effects. The dependent variable for service time in Columns (1) is log-transformed. Standard errors clustered at the physician level are reported in parentheses. Significance levels are denoted as \*  $p < 0.1$ , \*\*  $p < 0.05$ , and \*\*\*  $p < 0.01$ .

**Table A.13 Randomized MPAP Introduction Time**

|                             | Service Time<br>(1) | 7-Day Revisit<br>(2) |
|-----------------------------|---------------------|----------------------|
| Mean of $\beta_{pseudo}$    | 0.0016              | 0.0004               |
| Std.Dev of $\beta_{pseudo}$ | 0.0427              | 0.0597               |
| Replication times           | 1000                | 1000                 |
| <i>t</i> -statistic         | 56.718              | 84.872               |
| <i>p</i> -value             | $p < 0.001$         | $p < 0.001$          |

Notes: The *t*-statistic is used to test whether the mean of  $\beta_{pseudo}$  differs significantly from the true value  $\beta$  reported in Columns (3) and (4) of Table 3 in the main manuscript.

**Table A.14 Robustness Check: Falsification Test Using 2016 Data**

|                     | Service time<br>(1) | 7-day revisit<br>(2) |
|---------------------|---------------------|----------------------|
| MPAP <i>Placebo</i> | - 0.033<br>(0.074)  | 0.138<br>(0.129)     |
| Controls            | Y                   | Y                    |
| Fixed Effects       | Y                   | Y                    |
| Observations        | 144,800             | 144,800              |

Notes: All the models include both department and time fixed effects. The dependent variable in Column (1) is log-transformed. Standard errors clustered at the physician level are reported in parentheses. Significance at \*  $p < 0.1$ , \*\*  $p < 0.05$ , and \*\*\*  $p < 0.01$ .

**Table A.15 Robustness Check: Exclusion of Patient Visits with Comorbidities**

|                | Service time<br>(1) | 7-day revisit<br>(2) |
|----------------|---------------------|----------------------|
| MPAP           | -0.080**<br>(0.036) | -0.165***<br>(0.050) |
| Controls       | Y                   | Y                    |
| Fixed Effects  | Y                   | Y                    |
| Observations   | 204,693             | 204,693              |
| Adjusted $R^2$ | 0.349               | -                    |

Notes: All the models include both department and time fixed effects. The dependent variable of service time in Columns (1) is log-transformed. Standard errors clustered at the physician level are reported in parentheses. Significance at \*  $p < 0.1$ , \*\*  $p < 0.05$ , and \*\*\*  $p < 0.01$ .

**Table A.16 Robustness Checks: Including CCI in Matching Strategies**

|                   | Service Time<br>(1) | 7-Day Revisit<br>(2) |
|-------------------|---------------------|----------------------|
| MPAP              | -0.073**<br>(0.035) | -0.161***<br>(0.036) |
| CCI               | 0.195***<br>(0.034) | -0.125***<br>(0.048) |
| Control Variables | Y                   | Y                    |
| Fixed Effects     | Y                   | Y                    |
| Observations      | 154,720             | 154,720              |
| Adjusted $R^2$    | 0.346               | -                    |

Notes: All the models include both department and time fixed effects. The dependent variable of service time in Columns (1) is log-transformed. Standard errors clustered at the physician level are reported in parentheses. Significance at \*  $p < 0.1$ , \*\*  $p < 0.05$ , and \*\*\*  $p < 0.01$ .

**Table A.17 International Classification of Diseases 10 (ICD-10) Codes**

| Code    | Type of Disease                                                                          |
|---------|------------------------------------------------------------------------------------------|
| A-B     | Certain Infectious and parasitic diseases                                                |
| C       | Malignant neoplasms                                                                      |
| D00-D09 | In situ neoplasms                                                                        |
| D50-D89 | Diseases of blood, blood-forming organs, immune mechanism                                |
| E       | Endocrine, nutritional and metabolic disease                                             |
| F       | Mental and behavioral disorders                                                          |
| G       | Diseases of the nervous system                                                           |
| H00-H59 | Diseases of the eye and adnexa                                                           |
| H60-H95 | Diseases of the ear and mastoid process                                                  |
| I       | Diseases of the circulatory system                                                       |
| J       | Diseases of the respiratory system                                                       |
| K       | Diseases of the digestive system                                                         |
| L       | Diseases of skin and subcutaneous tissue                                                 |
| M       | Diseases of the musculoskeletal system and connective tissue                             |
| N       | Diseases of the genitourinary system                                                     |
| O       | Pregnancy, childbirth, and the puerperium                                                |
| P       | Certain conditions originating in the perinatal period                                   |
| Q       | Congenital malformations, deformations, and chromosomal abnormalities                    |
| R       | Symptoms, signs, and abnormal clinical and laboratory findings, not elsewhere classified |
| S-T     | Injury, poisoning, and certain other consequences of external causes                     |
| V-Y     | External causes of morbidity and mortality                                               |
| Z       | Factors influencing health status and contact with health services                       |

**Table A.18 Robustness Checks on Unique ICD-10 and Patient Volume**

|                         | Number of Unique<br>ICD-10<br>(1) | Department Patient<br>Volume<br>(2) |
|-------------------------|-----------------------------------|-------------------------------------|
| MPAP                    | 0.070<br>(0.050)                  | -0.035<br>(0.101)                   |
| Controls                | Y                                 | Y                                   |
| Fixed Effects           | Y                                 | Y                                   |
| Observations            | 7,114                             | 7,114                               |
| Adjusted R <sup>2</sup> | 0.661                             | 0.795                               |

Notes: All the models include both department and time fixed effects. Standard errors clustered at the department level are reported in parentheses. Significance at \*  $p < 0.1$ , \*\*  $p < 0.05$ , and \*\*\*  $p < 0.01$ .
